# Supplementary material for: An arid early Holocene revealed by palynological evidence for the north-east Tibetan Plateau
Source: Copernicus journal article supplement (doi:10.5194/egusphere-2022-366), 2022-06-13
Supplement: Supplementary file 1 [file egusphere-2022-366-supplement.pdf]

1 *Supplement of*

2 **An arid early Holocene revealed by palynological evidence for the north-east**  
3 **Tibetan Plateau**

4 Nannan Wang et al.

5 *Correspondence to: Xianyong Cao ([xcao@itpcas.ac.cn](mailto:xcao@itpcas.ac.cn))*

6

7

8

9 **Quantitative climatic reconstruction of Gahai Lake**

10 **1. Modern pollen dataset and the meteorological data**

11 The modern pollen dataset ( $n=731$ ) is derived from the eastern Tibetan Plateau, which  
12 spans from 94.07–103.02°E and 29.13–38.48°N with an elevation between 2515 and  
13 5008 m a.s.l. (Fig.1 of the main text). This modern pollen dataset is derived from Cao  
14 et al. (2014) plus the recently published pollen data from Cao et al. (2021) and Wang  
15 et al. (2022).

16 Modern climatic data were obtained from the Chinese Meteorological Forcing Dataset  
17 (CMFD; gridded near-surface meteorological dataset) which contains remote-sensing  
18 products, reanalysis datasets, and in situ station data between 1979 and 2018 (He et al.,  
19 2020). This dataset has high spatial and temporal resolution, and its high reliability  
20 has already been confirmed for Tibetan Plateau. The climate data are assigned to the  
21 nearest 1 km × 1 km grid, which is calculated by smoothing spline interpolation of  
22 multi-annual means of climatic data from nearby meteorological stations, and this is  
23 achieved using the *rdist.earth* function in the *fields* package version 9.6.1 (Nychka et  
24 al., 2019) for R (version 3.6.0; R Core Team, 2020). We extracted climate data for  
25 each sample site of mean annual precipitation ( $P_{\text{ann}}$ ), mean temperature of the coldest  
26 month ( $Mt_{\text{co}}$ ) and warmest month ( $Mt_{\text{wa}}$ ), and mean annual temperature ( $T_{\text{ann}}$ ).

27 **2. Establishment of the pollen-climate transfer function**

28 Weighted averaging partial least squares regression (WA-PLS) was employed to  
 29 evaluate the potential of the pollen dataset for past climate reconstruction and its  
 30 performance was tested using “leave-one-out” cross-validation (ter Braak & Juggins,  
 31 1993) with  $R^2$  (coefficient of determination between observed and predicted values)  
 32 and RMSEP (root mean square error of prediction) (Birks, 1998). The number of  
 33 WA-PLS components used was selected using a randomisation *t*-test (Juggins and  
 34 Birks, 2012). The climate reconstruction was made using R software with the *rioja*  
 35 package version 0.7–3 (Juggins, 2012), and the pollen assemblages were square-root  
 36 transformed before reconstruction to reduce noise (Prentice, 1980).

37 **3. Reliability of the pollen-climate transfer function and reconstructions for**  
 38 **Gahai Lake**

39 Ordination analysis indicated that  $P_{ann}$  and  $Mt_{wa}$  are important climatic determinants  
 40 of pollen distribution, thus pollen–climate calibration-sets including  $P_{ann}$  and  $Mt_{wa}$   
 41 were established to assess the predictive power of this pollen dataset. The results of  
 42 “leave-one-out” cross-validation showed that the first component for  $P_{ann}$  ( $R^2=0.61$ ,  
 43 RMSEP=109.58 mm) and  $Mt_{wa}$  ( $R^2=0.37$ , RMSEP=2.56°C) performed well, which  
 44 generally makes for a reliable for reconstruction (Table S1).

45 **Table S1.** Model performance statistics as assessed by “leave-one-out” cross-validation for the  
 46 five components of the weighted averaging partial least square regression (WA-PLS). RMSEP:  
 47 root mean squared error of prediction;  $R^2$ : coefficient of determination between bootstrap  
 48 predicted and observed values; Ave. Bias: the average bias of the parameter estimate; Max. Bias:  
 49 the maximum bias of the parameter estimate; Rand. t-test: randomised t-test.

| Variables | Method             | RMSEP          | $R^2$          | Ave. Bias       | Max. Bias       | Rand. t-test |
|-----------|--------------------|----------------|----------------|-----------------|-----------------|--------------|
| $P_{ann}$ | <b>Component 1</b> | <b>109.58</b>  | <b>0.6105</b>  | <b>-0.60344</b> | <b>165.7842</b> | <b>0.001</b> |
|           | Component 2        | 106.33         | 0.6367         | -0.17538        | 173.9644        | 0.048        |
|           | Component 3        | 104.33         | 0.6493         | -0.08673        | 150.1874        | 0.077        |
|           | Component 4        | 104.37         | 0.6501         | -1.22009        | 149.6598        | 0.527        |
|           | Component 5        | 104.88         | 0.6479         | -0.02029        | 155.7057        | 0.800        |
| $Mt_{wa}$ | <b>Component 1</b> | <b>2.55976</b> | <b>0.36841</b> | <b>0.05264</b>  | <b>6.02357</b>  | <b>0.001</b> |
|           | Component 2        | 2.49063        | 0.40540        | 0.07848         | 5.89699         | 0.025        |

|             |         |         |          |         |       |
|-------------|---------|---------|----------|---------|-------|
| Component 3 | 2.49095 | 0.40748 | -0.00082 | 5.39354 | 0.526 |
| Component 4 | 2.51670 | 0.40148 | 0.01266  | 4.97078 | 0.872 |
| Component 5 | 2.55368 | 0.39158 | -0.00821 | 5.04967 | 0.935 |

50 We argue in detail that the arboreal pollen should be treated as exogenous components  
 51 before 7.4 ka BP in the main text, and we reconstructed  $P_{\text{ann}}$  and  $M_{\text{twa}}$  based on the  
 52 fossil pollen record either including or excluding arboreal pollen taxa, to investigate  
 53 the potential ranges of  $P_{\text{ann}}$  and  $M_{\text{twa}}$  between 14.2 and 7.4 ka BP.

54 The quantitative reconstructions show that the exogenous arboreal pollen taxa have no  
 55 significant effect on  $M_{\text{twa}}$ , but do have a great impact on  $P_{\text{ann}}$  between 14.2 and 7.4 ka  
 56 BP (Fig. S1). From 14.2 to 7.4 ka BP,  $P_{\text{ann}}$  ranges from 400 to 734 mm, and  $M_{\text{twa}}$   
 57 varies between 7.7 and 10°C.  $M_{\text{twa}}$  shows a slight decrease during 10.8–7.4 ka BP,  
 58 whereas  $P_{\text{ann}}$  has no significant change compared with the former stage. The highest  
 59 values of  $P_{\text{ann}}$  and  $M_{\text{twa}}$  occur between 7.4 and 3.8 ka BP. After 3.8 ka BP,  $P_{\text{ann}}$   
 60 decreases continuously while  $M_{\text{twa}}$  holds low values with little temporal changes (Fig.  
 61 S1).

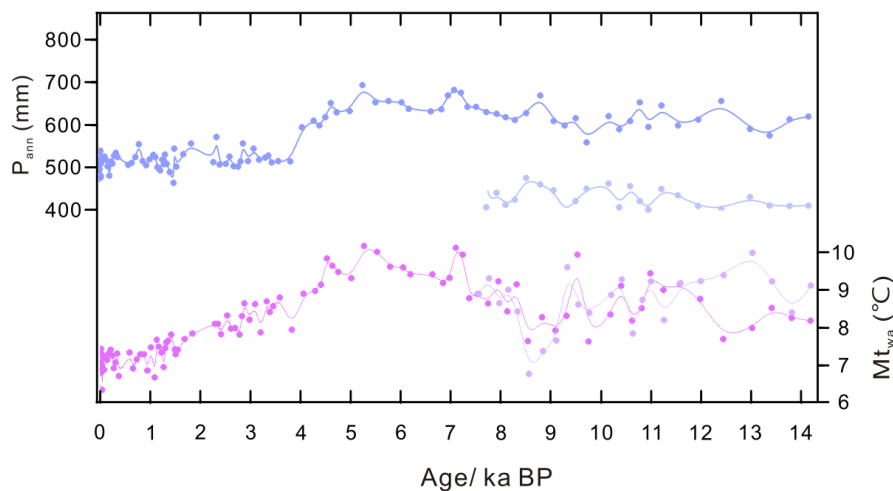

62  
 63 **Figure S1.** Reconstructions of  $P_{\text{ann}}$  and  $M_{\text{twa}}$  for Gahai Lake based on the fossil pollen record  
 64 either including (darker lines) or excluding (lighter lines) arboreal pollen taxa before 7.4 ka BP.

## 65 Supplementary References

66 Birks, H. J. B.: Numerical tools in quantitative palaeolimnology: Progress,  
 67 potentialities, and problems, *J. Paleolimnol.*, 20, 301–332, doi:  
 68 10.1023/A:1008038808690, 1998.

69 Cao, X., Herzschuh, U., Telford, R. J., and Ni, J.: A modern pollen-climate dataset  
70 from China and Mongolia: Assessing its potential for climate reconstruction, *Rev.*  
71 *Palaeobot. Palynol.*, 211, 87–96, doi: 10.1016/j.revpalbo.2014.08.007, 2014.

72 Cao, X., Tian, F., Li, K., Ni, J., Yu, X., Liu, L., and Wang, N.: Lake surface-sediment  
73 pollen dataset for the alpine meadow vegetation type from the eastern Tibetan  
74 Plateau and its potential in past climate reconstructions, *Earth Syst. Sci. Data*, 13,  
75 3525–3537, doi: 10.5194/essd-13-3525-2021, 2021.

76 He, J., Yang, K., Tang, W., Lu, H., Qin, J., Chen, Y., and Li, X.: The first  
77 high-resolution meteorological forcing dataset for land process studies over  
78 China, *Sci. Data*, 7, 25, doi: 10.1038/s41597-020-0369-y, 2020.

79 Juggins, S.: Rioja: analysis of Quaternary Science Data version 0.7-3, available at:  
80 <http://cran.r-project.org/web/packages/rioja/index.html> (last access: June 2020),  
81 2012.

82 Juggins, S. and Birks, H. J. B.: Quantitative environmental reconstructions from  
83 biological data, in: Birks, H. J. B., Lotter, A. F., Juggins, S., and Smol, J. P.,  
84 *Tracking environmental change using lake sediments (vol. 5): Data handling and*  
85 *numerical techniques*, Springer, Dordrecht, 431–494, 2012.

86 Nychka, D., Furrer, R., Paige, J., and Sain, S.: *fields: Tools for spatial data, version*  
87 *9.6.1*, available at: <https://cran.r-project.org/web/packages/fields/> (last access:  
88 June 2020), 2019.

89 R Core Team.: *R, A language and environment for statistical computing*. R  
90 Foundation for Statistical Computing, Vienna, 2020.

91 ter Braak, C. J. F., and Juggins, S.: Weighted averaging partial least squares regression  
92 (WA-PLS): an improved method for reconstructing environmental variables from  
93 species assemblages, *Hydrobiologia*, 269–270, 485–502, doi:  
94 10.1007/BF00028046, 1993.

95 Wang, N., Liu, L., Zhang, Y., and Cao, X.: A modern pollen dataset for the  
96 forest-meadow-steppe ecotone from the Tibetan Plateau and its potential use in  
97 past vegetation reconstruction, *Boreas*, doi: 10.1111/bor.12589, 2022.
